# Supplementary material for: Naturally Occurring Differences in CENH3 Affect Chromosome Segregation in Zygotic Mitosis of Hybrids
Source: PubMed Central journal article supplement (PMC4314295; doi:10.1371/journal.pgen.1004970), 2015-01-26

**Figure S1A**

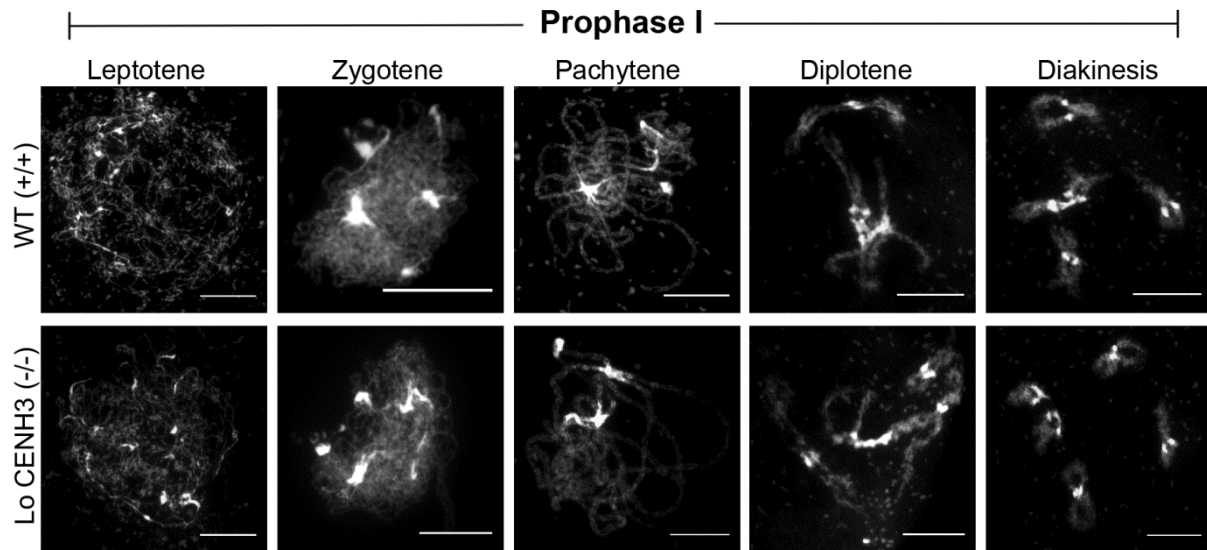

**Figure S1B**

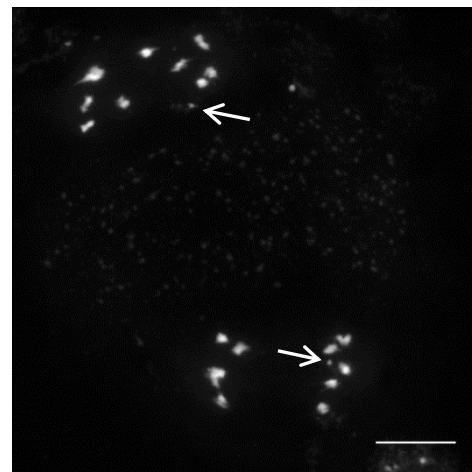

Supplement: pgen.1004970.s001.pdf [file pgen.1004970.s001.pdf]
